# Supplementary material for: Proteasome Dysfunction Leads to Suppression of the Hypoxic Response Pathway in Arabidopsis
Source: MDPI journal article supplement (doi:10.3390/ijms232416148), 2022-12-18
Supplement: s1 [file s1]

## Supplementary Materials

Table S1. *Pbe1 pbe2* double mutants are inviable

| Genotypes of Progeny from Selfed AaBb Parent <sup>a</sup>                                                                                                                                                                                                                                                                                      |                     |       |                         |
|------------------------------------------------------------------------------------------------------------------------------------------------------------------------------------------------------------------------------------------------------------------------------------------------------------------------------------------------|---------------------|-------|-------------------------|
| Genotype                                                                                                                                                                                                                                                                                                                                       | Number <sup>b</sup> | %     | Expected % <sup>c</sup> |
| AxBy <sup>d</sup>                                                                                                                                                                                                                                                                                                                              | 266                 | 80.1% | 56.25%                  |
| aaBB                                                                                                                                                                                                                                                                                                                                           | 35                  | 10.5% | 6.25%                   |
| AAbb                                                                                                                                                                                                                                                                                                                                           | 31                  | 9.3%  | 6.25%                   |
| aaBb                                                                                                                                                                                                                                                                                                                                           | 0                   | 0     | 12.5%                   |
| Aabb                                                                                                                                                                                                                                                                                                                                           | 0                   | 0     | 12.5%                   |
| aabb                                                                                                                                                                                                                                                                                                                                           | 0                   | 0     | 6.25%                   |
| <sup>a</sup> <i>PBE1</i> (A), <i>pbe1</i> (a), <i>PBE2</i> (B), <i>pbe2</i> (b). <i>pbe1</i> is SALK_092686, <i>pbe2</i> is SALK_004669.<br><sup>b</sup> Total individuals genotyped = 332.<br><sup>c</sup> Expected genotypes if all combinations are viable.<br><sup>d</sup> x is A or a; y is B or b. AxBy includes AABB, AaBB, AABb, AaBb. |                     |       |                         |

Table S4. All primers used in this study.

| Gene    | AGI ID    | Name                     | 5' to 3'                                               |
|---------|-----------|--------------------------|--------------------------------------------------------|
| ACTIN8  | AT1G49240 | ACT8-qF<br>ACT8-qR       | CCCGAGCAGCATGAAGATTA<br>CTGAGGGAAGCAAGGATAGAAC         |
| PP2A    | AT1G69960 | PP2A-qF<br>PP2A-qR       | TATCGGATGACGATTCTTCGTGCAG<br>GCTTGGTCGACTATCGGAATGAGAG |
| ADH1    | AT1G77120 | ADH1-qF<br>ADH1-qR       | GAATCGCTGGTGCTTCTA<br>CCTGTTGAATTGGCTTGTC              |
| RGAT1   | AT1G19530 | RGAT1-qF<br>RGAT1-qR     | AAGAAGAATGAAGAAGAAGAACA<br>CTCCACCATCCACTACTC          |
| CBP60G  | AT5G26920 | CBP60G-qF<br>CBP60G-qR   | AACACTTCTCTTCAACTCTG<br>CTGTAATGCGGTTAAGGTT            |
| CYP81F2 | AT5G57220 | CYP81F2-qF<br>CYP81F2-qR | TCTTCATTGCCTCTCGTA<br>ATAGTGGTGTAATCGTAAGC             |
| ERF071  | AT2G47520 | ERF071-qF<br>ERF071-qR   | GTAGAAGAAGAAGCCGATACTA<br>TAATCCTCCAATGCCATCA          |
| PCO1    | AT5G15120 | PCO1-qF<br>PCO1-qR       | TGGTCCTGGTGTTATTCC<br>GTTATTGGTGCGAAGAC                |
| PCO2    | AT5G39890 | PCO2-qF<br>PCO2-qR       | CGGTTCTTGATGTTATTGGT<br>CATAGCCTTCCTTCTCCTC            |
| POX1    | AT3G30775 | POX1-qF<br>POX1-qR       | TTCTCGCAACACATAACG<br>GCATCTGACATACCATATAGC            |
| SUS1    | AT5G20830 | SUS1-qF<br>SUS1-qR       | GCAACAAGGACTCAACATTA<br>GGCACACGAAGAATATCAC            |
| SUS4    | AT3G43190 | SUS4-qF<br>SUS4-qR       | GCATCTACTTCGCTTACAC<br>TGGCTTCTCTTGTCCTT               |
| WRKY70  | AT3G56400 | WRKY70-qF<br>WRKY70-qR   | ACACCATCTCCGTTCTTG<br>TTGCCGTCGTTATCACAT               |
| PAA2    | AT2G05840 | PAA2-qF<br>PAA2-qR       | GTCCGAGGGAAAGATTCAGTATGC<br>CCAGTGGCTAACAATCCAAGGT     |
| PAG1    | AT2G27020 | PAG1-qF<br>PAG1-qR       | TGGCTTGCTCTGGCTTGA<br>GTTCCAATGCTACTCATCTTCCTT         |
| PBA1    | AT4G31300 | PBA1-qF<br>PBA1-qR       | CTACTTCCTTCACCAGCATACAAT<br>ATCCTCCAACGATGAGACCA       |
| PBE1    | AT1G13060 | PBE1-qF<br>PBE1-qR       | ATATGCTTACGGTGTGCTGGA<br>CGGAATGTGCGATGGTAGATTG        |
| PBE2    | AT3G26340 | PBE2-qF<br>PBE2-qR       | GTTCAGGTTCAACATACGCTTAT<br>CTTGCTAACTCTGAGGCTTCTC      |
| RPT2A   | AT4G29040 | RPT2A-qF<br>RPT2A-qR     | TGAGAGTTGTTGGTAGTGA<br>GAAGACGATTGATGGTGAA             |
| RPN10   | AT4G38630 | RPN10-qF<br>RPN10-qR     | CGCCTCACAGGAGACAGT<br>TTCACATCACCAACAGACATAGC          |
| RPN12A  | AT1G64520 | RPN12A-qF<br>RPN12A-qR   | TGAGTGGGAAGTGAAGGAAGG<br>GCTTAGAGTCTGGTTGATGAGTTG      |
